# Supplementary material for: Energy Transfer-Based Recognition of Membrane Cholesterol by Controlling Intradistance of Linker
Source: MDPI journal article supplement (doi:10.3390/s24072315), 2024-04-05
Supplement: s1 [file s1]

# **Energy Transfer-Based Recognition of Membrane Cholesterol by Controlling Intradistance of Linker**

**Yong Ho Cho <sup>1</sup>, Tae Kyung Won <sup>1</sup> and Dong June Ahn <sup>1,2,\*</sup>**

<sup>1</sup> Department of Chemical and Biological Engineering, Korea University, Seoul 02841, Republic of Korea; cyh9312@korea.ac.kr (Y.H.C.); callys@korea.ac.kr (T.K.W.)

<sup>2</sup> KU-KIST Graduate School of Converging Science and Technology, Korea University, Seoul 02841, Republic of Korea

\* Correspondence: ahn@korea.ac.kr; Tel.: +82-02-3290-3301

**Table of contents**

**Supplementary Figures 1–10**

**Supplementary Table 1**

**Supplementary Video 1**

## Supplementary Figures

**a**

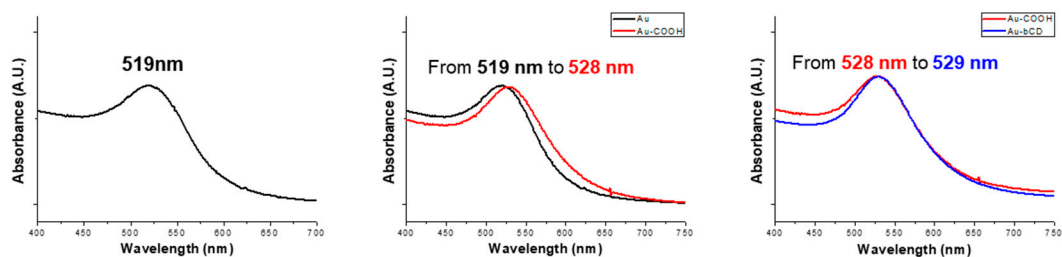

**b**

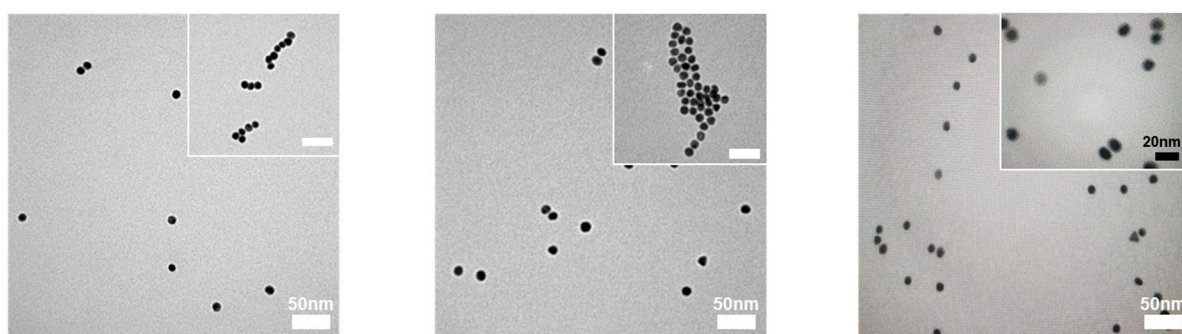

**Figure S1. Analysis of visible spectroscopy and transmittance electron microscopy (TEM) images in the process of AuNP/C12/βCD fabrication.** (a) Absorption spectra and (b) TEM images of AuNP/Citrate, AuNP/C12, and AuNP/C12/βCD particles.

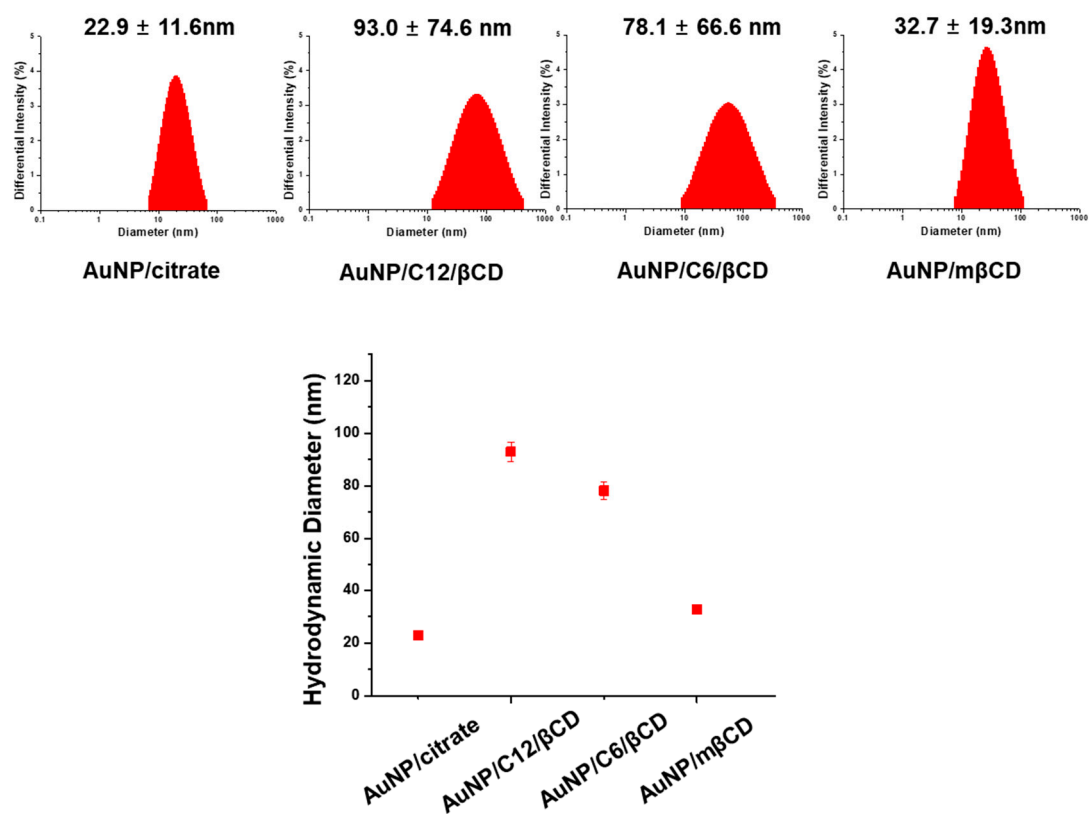

**Figure S2.** Analysis of dynamic light scattering with AuNP-βCD particles. Hydrodynamic diameters of AuNP/citrate, AuNP/C12/βCD, AuNP/C6/βCD, and AuNP/mβCD.

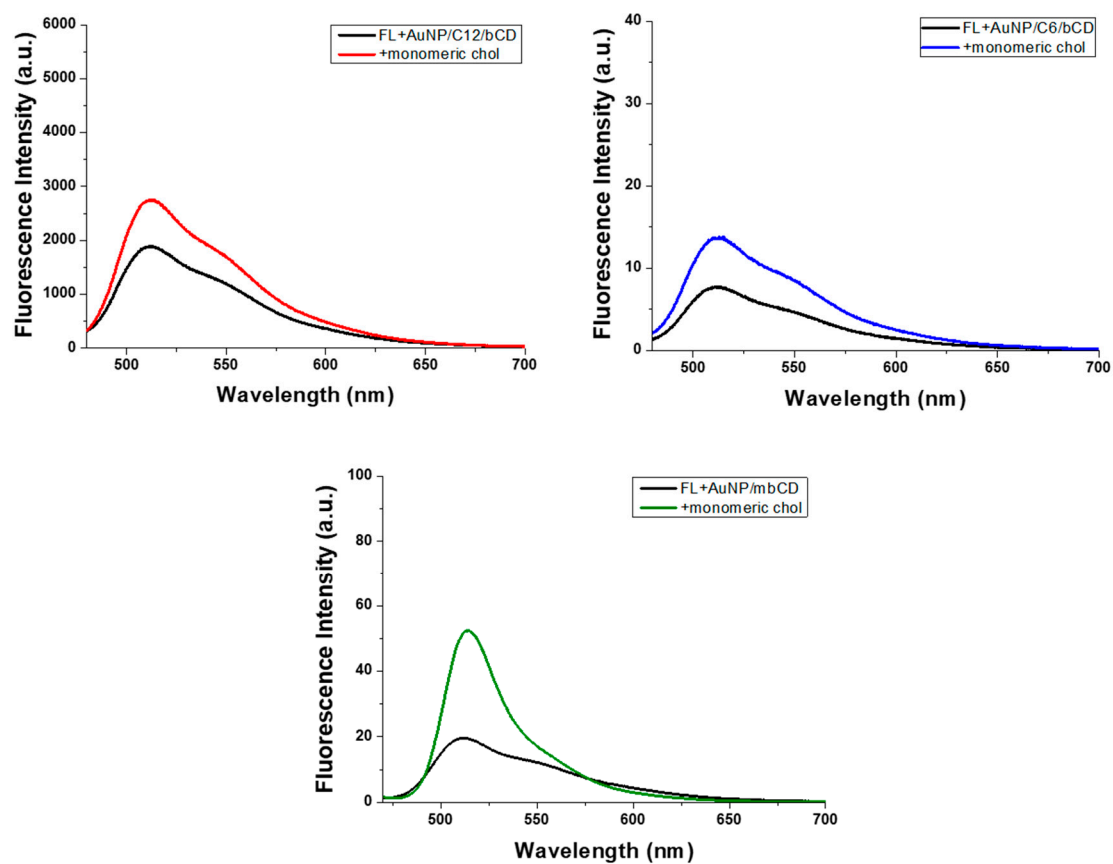

**Figure S3. Photoluminescence spectra for recognition of monomeric cholesterol.** Fluorescence recovery of AuNP- $\beta$ CD-FI particles before and after treatment with monomeric cholesterol.

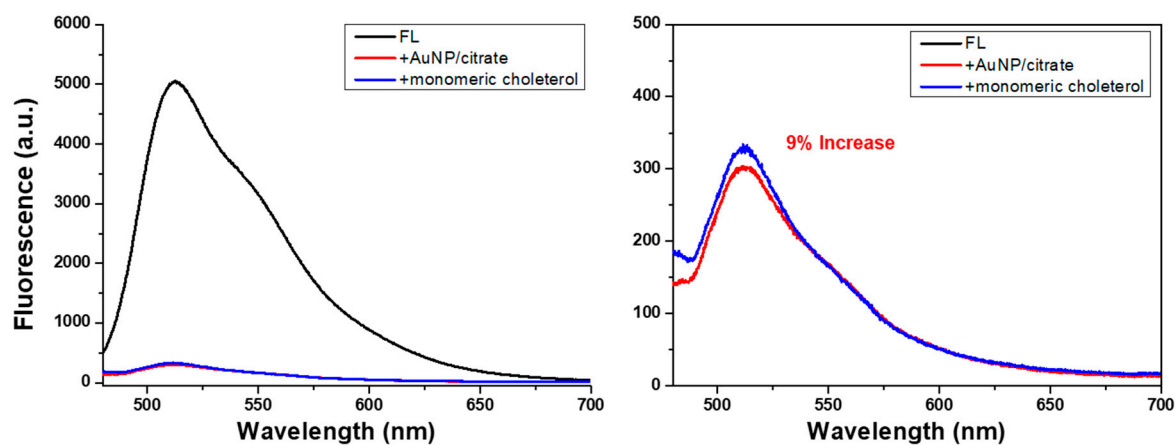

**Figure S4. Photoluminescence spectra of fluorescence quenching and turn-on recovery process with AuNP/Citrate.** PL intensity of fluorescence of FI quenched with AuNP/Citrate and recovered without specific recognition of monomeric cholesterol.

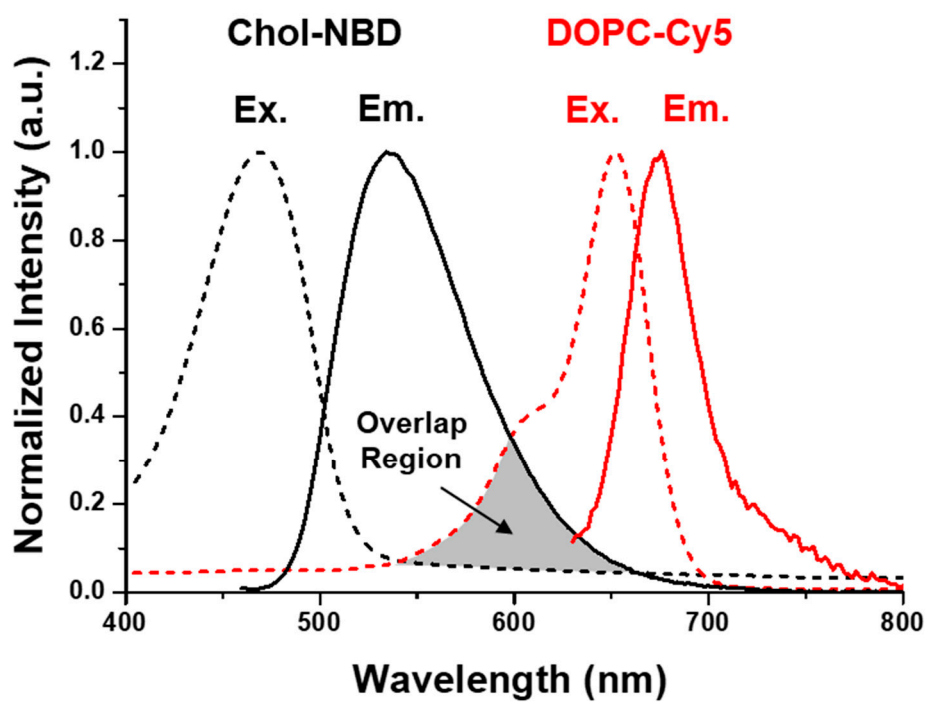

**Figure S5.** Optical properties of Chol-NBD and DOPC-Cy5 molecules for FRET. Excitation and emission spectra of Chol-NBD (donor) and DOPC-Cy5 (acceptor) molecules for FRET. There was an overlap region between the emission band of donor and excitation band of acceptor.

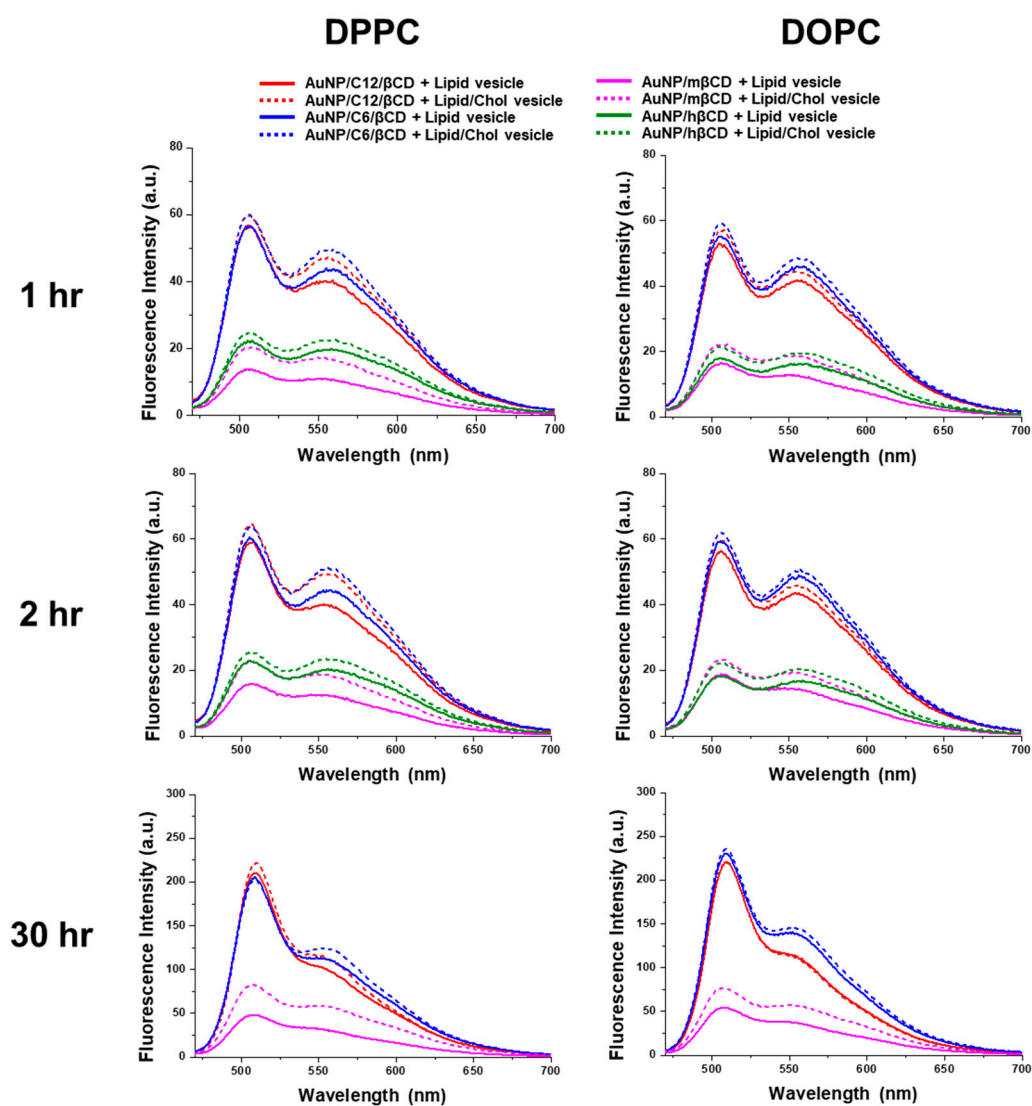

**Figure S6. Fluorescence recovery with recognition of membrane cholesterol with quenched AuNP- $\beta$ CD-Fl complexes.** Photoluminescence spectra before and after treatment of four types of liposome particles (DPPC, DPPC/Chol, DOPC, and DOPC/Chol) for 1, 2, and 30 h with quenched AuNP- $\beta$ CD-Fl complexes.

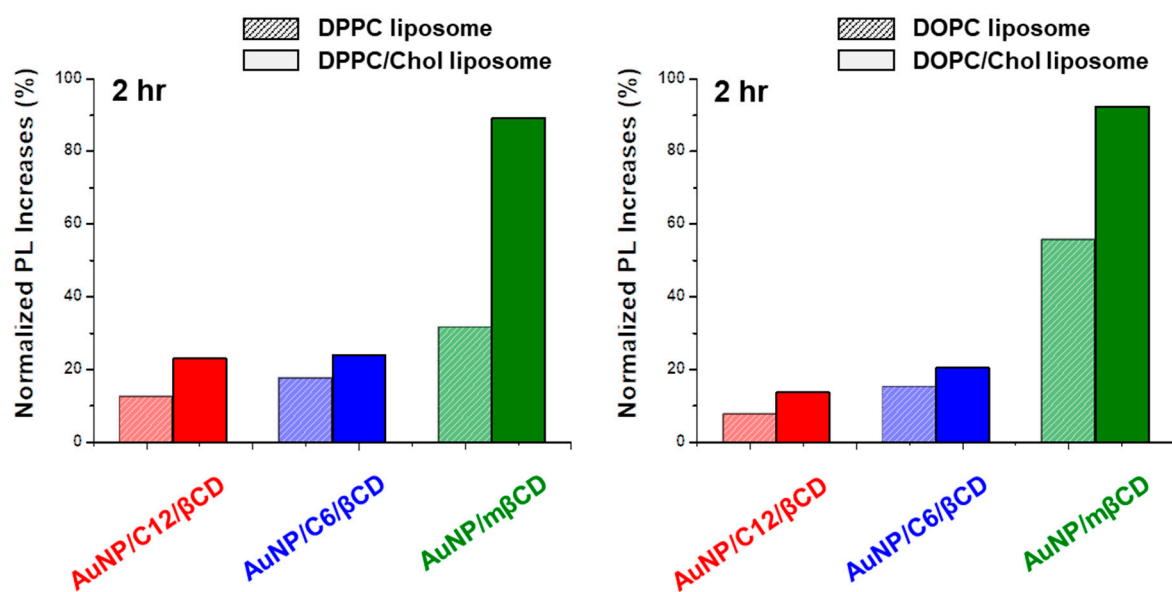

Figure S7. Fluorescence recovery after 2 h treatment of liposome particles with quenched AuNP-βCD-FI complexes. The normalized PL increases of quenched AuNP/βCD particles after 2 h treatment of liposome particles.



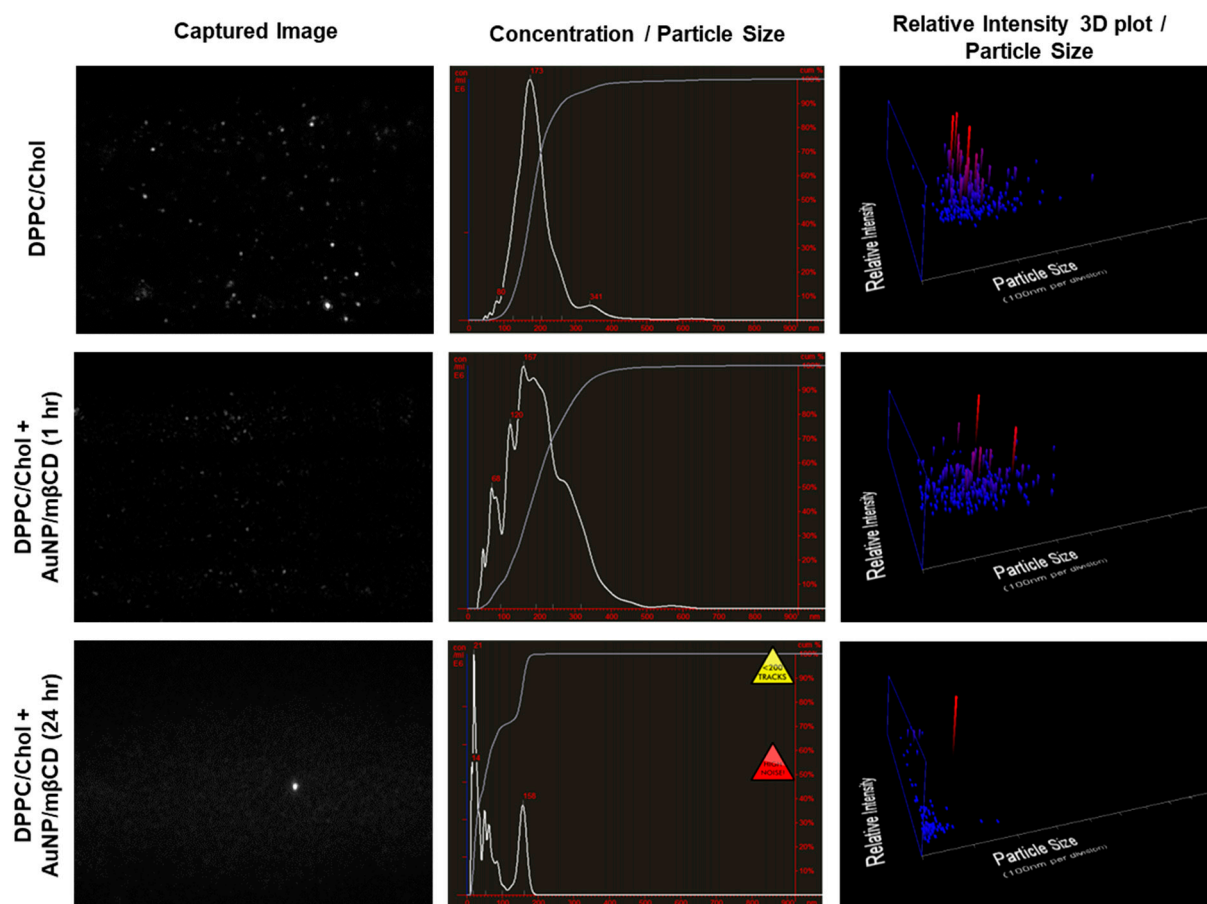

Figure S8. Nanoparticle tracking analysis of DPPC/Chol liposomes before and after treatment with AuNP/mβCD. Captured images, size distribution, and 3D plot mapping of DPPC/Chol liposomes.

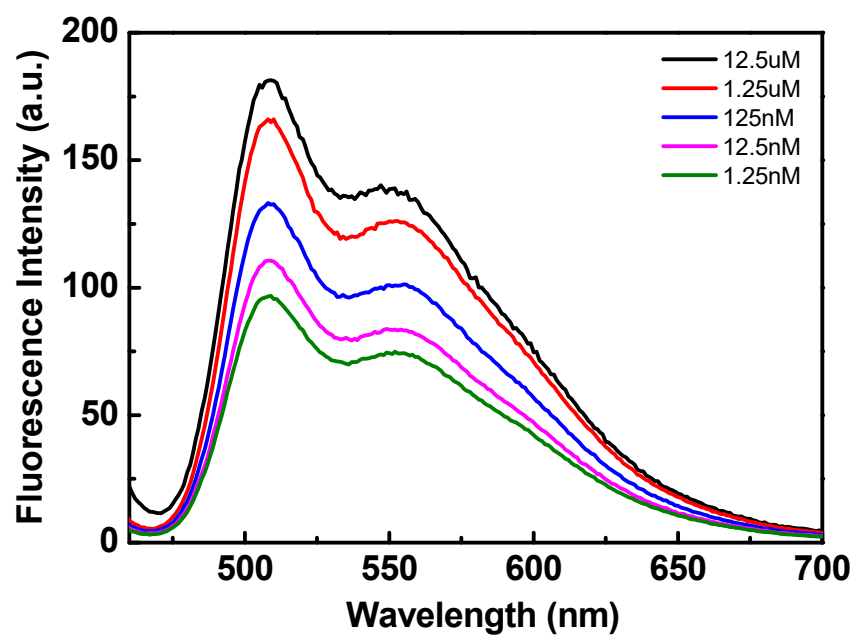

**Figure S9. Fluorescence recovery with different concentrations of membrane cholesterol.** Photoluminescence spectra with AuNP/mβCD-Fl complex after treatment with DOPC/Chol liposome.

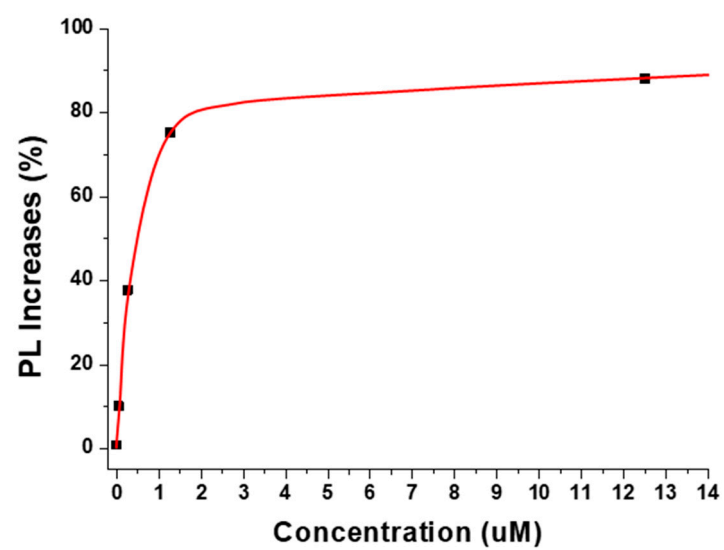

Figure S10. PL response of AuNP/m $\beta$ CD on DOPC/Chol liposomes for the cholesterol concentration expressed linear scales with x axis.

Supplementary Table

Table S1. Calculation of recovered fluorescence with AuNPs- $\beta$ CD-Fl interaction after recognition of membrane cholesterol.

| AuNP- $\beta$ CD     | Quenched PL intensity ( $I_0$ ) | Normalized PI Intensity for target molecules (I) |       |        |           |       |        |
|----------------------|---------------------------------|--------------------------------------------------|-------|--------|-----------|-------|--------|
|                      |                                 | DPPC                                             |       |        | DPPC/CHOL |       |        |
|                      |                                 | 1 h                                              | 2 h   | 30 h   | 1 h       | 2 h   | 30 h   |
| AuNP/C12/ $\beta$ CD | 52.43                           | 56.82                                            | 58.95 | 210.30 | 60.14     | 64.56 | 221.84 |
| PL increasing(%)     | -                               | 8.4                                              | 12.4  | 301.1  | 14.7      | 23.1  | 323.1  |
| AuNP/C6/ $\beta$ CD  | 51.44                           | 56.49                                            | 60.49 | 207.64 | 60.09     | 63.74 | 202.25 |
| PL increasing(%)     | -                               | 9.8                                              | 17.6  | 303.7  | 16.8      | 23.9  | 293.2  |
| AuNP/m $\beta$ CD    | 12.12                           | 13.79                                            | 15.95 | 48.07  | 20.55     | 22.93 | 82.93  |
| PL increasing(%)     | -                               | 13.8                                             | 31.6  | 296.6  | 69.6      | 89.2  | 584.3  |
|                      |                                 | DOPC                                             |       |        | DOPC/CHOL |       |        |
|                      |                                 | 1 h                                              | 2 h   | 30 h   | 1 h       | 2 h   | 30 h   |
| AuNP/C12/ $\beta$ CD | 52.43                           | 52.98                                            | 56.42 | 220.98 | 57.11     | 59.62 | 210.44 |
| PL increasing(%)     | -                               | 1.0                                              | 7.6   | 321.4  | 8.9       | 13.7  | 301.3  |
| AuNP/C6/ $\beta$ CD  | 51.44                           | 55.20                                            | 59.28 | 230.12 | 59.06     | 61.99 | 235.83 |
| PL increasing(%)     | -                               | 7.3                                              | 15.2  | 347.3  | 14.8      | 20.5  | 358.4  |
| AuNP/m $\beta$ CD    | 12.12                           | 16.59                                            | 18.86 | 54.29  | 22.39     | 23.32 | 77.06  |
| PL increasing(%)     | -                               | 36.9                                             | 55.6  | 348.0  | 84.7      | 92.4  | 535.9  |

## Supplementary Video

**Video S1. Scattered light of DPPC/Chol liposome particles before and after treatment (1 and 30 hr) of quenched AuNP/m $\beta$ CD.**
